# Supplementary material
Source: PubMed Central journal article supplement (PMC6609982)
Supplement: DB181307SupplementaryData2.pdf [file DB181307SupplementaryData2.pdf]

SUPPLEMENTARY DATA

**Supplementary Table 1. qPCR Sequence Information.**

| <b>Name</b>      | <b>Sequence/Ordering Information</b>          |
|------------------|-----------------------------------------------|
| GAPDH For        | TCACCACCATGGAGAAGGC                           |
| GAPDH Rev        | GCTAAGCAGTTGGTGGTGCA                          |
| Fpr1 For         | CCATTTGGTTGGTTCATGTGC                         |
| Fpr1 Rev         | CTTCTTGGCTAGGCTCACAGT                         |
| Fpr2 For         | CACCATTGAGAGGATCCACAG                         |
| Fpr2 Rev         | CACAGGAACCGAAGAGTGTAAG                        |
| Proglucagon For  | ACACCTGTTCGCAGCTCAGGC                         |
| Proglucagon Rev  | AAATCTTGGGCACGGCGGGAG                         |
| IL-1 $\beta$ For | AAATACCTGTGGCCTTGGGC                          |
| IL-1 $\beta$ Rev | CTTGGGATCCACACTCTCCAG                         |
| TNF $\alpha$ For | GCCACCACGCTCTTCTGCCT                          |
| TNF $\alpha$ Rev | GGCTGATGGTGTGGGTGAGG                          |
| IL-10 For        | CATGGCCCAGAAATCAAGGA                          |
| IL-10 Rev        | GGAGAAATCGATGACAGCGC                          |
| Alox5 For        | ACTACATCTACCTCAGCCTCATT                       |
| Alox5 Rev        | GGTGACATCGTAGGAGTCCAC                         |
| Fpr3 For         | IDT PrimeTime qPCR Assay Mm.PT.58.16696236.g  |
| Fpr3 Rev         | IDT PrimeTime qPCR Assay Mm.PT.58.16696236.g  |
| Fpr-rs4 For      | IDT PrimeTime qPCR Assay Mm.PT.56a.29119106.g |
| Fpr-rs4 Rev      | IDT PrimeTime qPCR Assay Mm.PT.56a.29119106.g |
