# Supplementary material
Source: PubMed Central journal article supplement (PMC6609982)
Supplement: DB181307SupplementaryData3.pdf [file DB181307SupplementaryData3.pdf]

SUPPLEMENTARY DATA

**Supplementary Table 2. Antibodies Used in Immunoblot, Immunofluorescence and Flow Cytometry Analyses.**

| REAGENT or RESOURCE                         | SOURCE         | IDENTIFIER       |
|---------------------------------------------|----------------|------------------|
| Antibodies                                  |                |                  |
| Guinea pig anti-insulin                     | DAKO           | Cat# IS002       |
| Donkey anti-guinea pig Alexafluor488        | Jackson Labs   | Cat# 706-545-148 |
| Goat anti-GLP-1                             | Santa Cruz     | Cat# sc-7782     |
| Rabbit anti-FPR                             | Abcam          | Cat# ab113531    |
| Donkey anti-rabbit Alexafluor568            | ThermoFisher   | Cat# A10042      |
| Rat anti-Mac2(Galectin-3)                   | Cedarlane      | Cat# CL8942AP    |
| Rabbit anti-HSP90 $\alpha\beta$ (H-114)     | Santa Cruz     | Cat# sc-7947     |
| Rabbit anti-FPR                             | Genetex        | Cat# GTX71283    |
| APC/Cy7 Rat anti-MHCII                      | Biologend      | Cat# 107627      |
| PE Rat anti-Siglec F                        | BD Biosciences | Cat# 552126      |
| APC/Cy7 Rat anti-CD4                        | Biologend      | Cat# 100413      |
| FITC Rat anti-CD11b                         | eBioscience    | Cat# 11-0112-41  |
| APC Rat anti-CD19                           | eBioscience    | Cat# 17-0193-80  |
| PE/Cy7 Rat anti-F4/80                       | eBioscience    | Cat# 25-4801-82  |
| NC206 Rat anti-CD45                         | eBioscience    | Cat# 12-0451-81  |
| eFluor450 Armenian hamster anti-CD11c       | eBioscience    | Cat# 48-0114-80  |
| LIVE/DEAD™ Fixable Aqua Dead Cell Stain Kit | eBioscience    | Cat# L34957      |
| FITC Rat anti-GATA3(CD8a)                   | eBioscience    | Cat# 11-0081-81  |
| PE Rat anti-CD8                             | eBioscience    | Cat# 12-0081-81  |
| APC Rat anti-rorg(t)                        | eBioscience    | Cat# 17-6988-80  |
| PE/Cy7 Rat anti-FOXP3                       | eBioscience    | Cat# 25-5773-80  |
| eVolve605 Rat anti-CD45                     | eBioscience    | Cat# 83-0451-42  |
| PacificBlue Mouse anti-CD3                  | eBioscience    | Cat# MHCD0328    |
